# Supplementary material for: Factors affecting hospital admission, hospital length of stay and new discharge destination post proximal humeral fracture: a retrospective audit
Source: Springer Nature journal article supplement (doi:10.1186/s12877-024-04928-z), 2024-04-12
Supplement: MOESM1 [file 26972080]

# Case Record Form (CRF)

## Patient Details

Study ID number:

DOB (date of birth):

Age:

Gender:  M  F

## Discharge Destination and Length of Stay (LOS) Outcomes

Admission date:

Discharge date:

ED admission  Yes  No

Acute ward admission  Yes  No

Subacute admission  Yes  No

Final discharge destination  Home alone  Home with social supports (family/friends)  
 External Care Facility  Death during admission  
 External Health Care Service

## Fracture and additional Injury Factors

PHF Diagnosis  Yes  
 No = Excluded from study (cease audit)

Fracture severity  Open  Closed –non-displaced  Closed –displaced  
 Not documented

Pathological fracture  Yes = Excluded from study (cease audit)  No

Location of fracture  Whilst admitted in hospital = Excluded from study (cease audit)  
 Outside of Hospital

Treatment method  Surgical management  Conservative management

Orthopaedic restrictions  Restrictions  No/Minimal Restrictions

Initial documented orthopaedic management and orders

Any documented updates or changes to the orthopaedic management and orders

Additional significant injuries sustained (fractures; subdural haemorrhage)

No

Yes

Type(s):

# Case Record Form (CRF)

## Patient Premorbid Status Factors

**Premorbid Living Situation**  Home alone  External Care Facility  
 Home with social supports (family/friends)

---

**Premorbid level of mobility**  Independent  Supervision/Assistance/Dependent

### Premorbid use of gait aid

Nil aid, single point stick (SPS) or forearm crutch (FAC)  
 Frame (two wheeled frame (2WF), four wheeled frame (4WW/4WF), gutter-frame (GF) or pick-up frame (PUF))  
 Non-ambulant

**Premorbid level of personal self care**  Independent  Supervision/Assistance/Dependent

**Dominant Upper-limb affected**  Yes  No  Not documented

## Patient Clinical Factors

### Additional principle medical diagnosis

No  Yes Diagnosis: \_\_\_\_\_

### Charlson Comorbidity Index (CCI)

| Score              | Age/Condition                                                                                                                                                                                                                                                                                                                                                                                                                                                                                                                                                                                                                                                                                                                          |
|--------------------|----------------------------------------------------------------------------------------------------------------------------------------------------------------------------------------------------------------------------------------------------------------------------------------------------------------------------------------------------------------------------------------------------------------------------------------------------------------------------------------------------------------------------------------------------------------------------------------------------------------------------------------------------------------------------------------------------------------------------------------|
| 1                  | <input type="checkbox"/> Age 50-59<br><input type="checkbox"/> Myocardial infarction (MI)<br><input type="checkbox"/> Congestive heart failure (CHF)<br><input type="checkbox"/> Peripheral vascular disease (PVD)<br><input type="checkbox"/> Cerebrovascular accident (CVA) or transient ischaemic attack (TIA).<br><input type="checkbox"/> Dementia<br><input type="checkbox"/> Chronic obstructive pulmonary disease (COPD)<br><input type="checkbox"/> Connective tissue disease<br><input type="checkbox"/> Peptic ulcer disease<br><input type="checkbox"/> Mild liver disease (without portal HTN, includes chronic hepatitis)<br><input type="checkbox"/> Diabetes without end-organ damage (excludes diet controlled alone) |
| 2                  | <input type="checkbox"/> Age 60-69<br><input type="checkbox"/> Hemiplegia<br><input type="checkbox"/> Moderate or severe renal disease<br><input type="checkbox"/> Diabetes with end-organ damage (retinopathy, neuropathy, nephropathy, or brittle diabetes)<br><input type="checkbox"/> Solid tumour without metastases<br><input type="checkbox"/> Leukaemia<br><input type="checkbox"/> Lymphoma                                                                                                                                                                                                                                                                                                                                   |
| 3                  | <input type="checkbox"/> Age 70-79<br><input type="checkbox"/> Moderate or severe liver disease                                                                                                                                                                                                                                                                                                                                                                                                                                                                                                                                                                                                                                        |
| 4                  | <input type="checkbox"/> Age $\geq 80$                                                                                                                                                                                                                                                                                                                                                                                                                                                                                                                                                                                                                                                                                                 |
| 6                  | <input type="checkbox"/> Metastatic solid tumour<br><input type="checkbox"/> AIDS (not just HIV positive).                                                                                                                                                                                                                                                                                                                                                                                                                                                                                                                                                                                                                             |
| <b>Total score</b> |                                                                                                                                                                                                                                                                                                                                                                                                                                                                                                                                                                                                                                                                                                                                        |

**Diagnosis of dementia**  Yes  No

**Diagnosis of osteoporosis**  Yes  No
